# Supplementary material for: Examining the sustainability and development challenge in agricultural-forest frontiers of the Amazon Basin through the eyes of locals
Source: Copernicus journal article supplement (doi:10.5194/nhess-2019-144), 2019-05-23
Supplement: Supplementary file 1 [file nhess-2019-144-supplement.pdf]

***The following supplements accompany the article***

**Table S1.** Preferred changes in components in Guarayos and Tapajós.

| Guarayos                                                    |                | Tapajós                                                |                |
|-------------------------------------------------------------|----------------|--------------------------------------------------------|----------------|
| Component                                                   | Desired Change | Component                                              | Desired Change |
| Agricultural Expansion                                      | Decrease       | Access to Viable Economic Activities and Finance       | Negative       |
| Agricultural Intensification                                | Neutral        | Agricultural Expansion                                 | Negative       |
| Application of Agricultural Law                             | Positive       | Climate Change                                         | Negative       |
| Application of Forest Law                                   | Positive       | Contamination                                          | Negative       |
| Biodiversity Loss                                           | Negative       | Deforestation                                          | Negative       |
| Climate Change                                              | Negative       | Depopulation of Rural Areas                            | Negative       |
| Compliance with Land Zoning                                 | Positive       | Environmental Monitoring                               | Positive       |
| Contamination                                               | Negative       | Financial Aid and Equality                             | Positive       |
| Deforestation                                               | Negative       | Forest Fires                                           | Negative       |
| Destruction of Environmental Services                       | Negative       | Forest Products Value                                  | Positive       |
| Destruction of Pampas                                       | Negative       | Illegal Logging                                        | Negative       |
| Fires                                                       | Negative       | Illegal Mining                                         | Negative       |
| Grazing Expansion                                           | Negative       | Incomplete Production Chains                           | Negative       |
| Illegal Hunting and Fishing                                 | Negative       | Positive in Amazon Population                          | Negative       |
| Illegal Logging                                             | Negative       | Infrastructure Projects                                | Neutral        |
| Illegal Mining                                              | Negative       | International Interest to Conserve Amazon              | Positive       |
| Immigration                                                 | Negative       | Lack of Efficiency in Policies for Subsistence Farming | Negative       |
| Inequality in Benefits                                      | Negative       | Lack of Environmental Awareness                        | Negative       |
| Lack of Awareness of Environmental Problems                 | Negative       | Lack of Governmental Co-ordination                     | Negative       |
| Lack of Credit                                              | Negative       | Lack of Protection of Traditional Forest Communities   | Negative       |
| Lack of Understanding, Application and Coordination of Laws | Negative       | Lack of Public Policy                                  | Negative       |
| Land Encroachment                                           | Negative       | Lack of Sustainable Development Models                 | Negative       |
| Land Trafficking                                            | Negative       | Lack of Technical Training and Assistance              | Negative       |
| Loss of Lakes and Natural Springs                           | Negative       | Loss of Biodiversity                                   | Negative       |
| Loss of Subsistence Agriculture in Guarayos Communities     | Negative       | Loss of Environmental Services                         | Negative       |
| Lower Crops Yields                                          | Negative       | Opportunities to Sell Environmental Services           | Positive       |
| Poor Administration by Community Leaders                    | Negative       | Population Purchasing Power                            | Positive       |
| Poverty                                                     | Negative       | Pressure from External Actors (agribusiness)           | Negative       |
| Soil Erosion                                                | Negative       | Social Organisation and Social Political Participation | Positive       |
|                                                             |                | Technical and Productive Capacity                      | Positive       |
|                                                             |                | Technology Supplied for Sustainable Land Use           | Positive       |
|                                                             |                | Use of Agrochemicals                                   | Neutral        |

**Table S2.** Component Indices for Guarayos

| Component                                                   | Outdegree | Indegree | Page Rank | Betweenness | Component Type |
|-------------------------------------------------------------|-----------|----------|-----------|-------------|----------------|
| Agricultural Expansion                                      | 1.75      | 2.05     | 0.037     | 0.056       | Ordinary       |
| Agricultural Intensification                                | 1.10      | 0.50     | 0.015     | 0.008       | Ordinary       |
| Application of Forest Law                                   | 0.50      | 0.90     | 0.014     | 0.007       | Ordinary       |
| Application of INRA                                         | 1.40      | 0.00     | 0.011     | 0.000       | Transmitter    |
| Biodiversity Loss                                           | 0.00      | 1.75     | 0.117     | 0.000       | Receiver       |
| Climate Change                                              | 0.80      | 0.50     | 0.026     | 0.030       | Ordinary       |
| Compliance with Land Zoning                                 | 0.20      | 0.70     | 0.014     | 0.007       | Ordinary       |
| Contamination                                               | 0.10      | 2.55     | 0.080     | 0.009       | Ordinary       |
| Deforestation                                               | 4.70      | 3.10     | 0.110     | 0.217       | Ordinary       |
| Destruction of Environmental Services                       | 0.00      | 0.90     | 0.026     | 0.000       | Receiver       |
| Destruction of Pampas                                       | 0.00      | 0.50     | 0.024     | 0.000       | Receiver       |
| Fires                                                       | 0.85      | 1.40     | 0.031     | 0.034       | Ordinary       |
| Grazing Expansion                                           | 1.60      | 0.50     | 0.015     | 0.010       | Ordinary       |
| Illegal Hunting and Fishing                                 | 0.85      | 0.75     | 0.053     | 0.021       | Ordinary       |
| Illegal Logging                                             | 0.50      | 0.20     | 0.050     | 0.083       | Ordinary       |
| Illegal Mining                                              | 1.10      | 0.00     | 0.011     | 0.000       | Transmitter    |
| Immigration                                                 | 0.90      | 0.90     | 0.020     | 0.020       | Ordinary       |
| Inequality in Benefits                                      | 0.90      | 0.90     | 0.020     | 0.019       | Ordinary       |
| Lack of Awareness of Environmental Problems                 | 0.50      | 0.00     | 0.011     | 0.000       | Transmitter    |
| Lack of Credit                                              | 0.75      | 0.00     | 0.011     | 0.000       | Transmitter    |
| Lack of Understanding, Application and Coordination of Laws | 1.85      | 0.00     | 0.011     | 0.000       | Transmitter    |
| Land Encroachment                                           | 0.25      | 0.50     | 0.021     | 0.000       | Ordinary       |
| Land Trafficking                                            | 0.90      | 0.00     | 0.011     | 0.000       | Transmitter    |
| Loss of Lakes and Natural Springs                           | 0.00      | 0.60     | 0.026     | 0.000       | Receiver       |
| Loss of Subsistence Agriculture in Guarayos Communities     | 0.90      | 0.90     | 0.028     | 0.034       | Ordinary       |
| Lower Crop Yields                                           | 0.60      | 1.90     | 0.068     | 0.098       | Ordinary       |
| Poor Administration by Community Leaders                    | 0.90      | 0.00     | 0.011     | 0.000       | Transmitter    |
| Poverty                                                     | 0.70      | 1.50     | 0.092     | 0.139       | Ordinary       |
| Soil Erosion                                                | 0.50      | 1.60     | 0.035     | 0.044       | Ordinary       |

**Table S3.** Component indices for Tapajós.

| Component                                              | Outdegree | Indegree | Page Rank | Betweenness | Component Type |
|--------------------------------------------------------|-----------|----------|-----------|-------------|----------------|
| Access to Viable Economic Activities and Finance       | 1.25      | 0.90     | 0.014     | 0.002       | Ordinary       |
| Agricultural Expansion                                 | 1.58      | 1.38     | 0.028     | 0.016       | Ordinary       |
| Climate Change                                         | 0.25      | 0.25     | 0.046     | 0.000       | Ordinary       |
| Contamination                                          | 1.50      | 2.25     | 0.043     | 0.005       | Ordinary       |
| Deforestation                                          | 2.13      | 7.00     | 0.164     | 0.088       | Ordinary       |
| Depopulation of Rural Areas                            | 0.00      | 0.50     | 0.017     | 0.000       | Receiver       |
| Environmental Monitoring                               | 1.73      | 0.83     | 0.013     | 0.005       | Ordinary       |
| Financial Aid and Equality                             | 0.75      | 0.13     | 0.013     | 0.001       | Ordinary       |
| Forest Fires                                           | 0.75      | 1.08     | 0.089     | 0.002       | Ordinary       |
| Forest Products Value                                  | 0.50      | 1.50     | 0.033     | 0.011       | Ordinary       |
| Illegal Logging                                        | 0.50      | 1.15     | 0.023     | 0.002       | Ordinary       |
| Illegal Mining                                         | 0.75      | 0.00     | 0.011     | 0.000       | Transmitter    |
| Incomplete Production Chain                            | 0.75      | 0.75     | 0.014     | 0.001       | Ordinary       |
| Increase in Amazon Population                          | 1.50      | 0.00     | 0.011     | 0.000       | Transmitter    |
| Infrastructure Projects                                | 1.15      | 1.65     | 0.027     | 0.017       | Ordinary       |
| International Interest to Conserve Amazon              | 0.50      | 0.00     | 0.011     | 0.000       | Transmitter    |
| Lack of Efficiency in Policies for Subsistence Farming | 2.40      | 0.00     | 0.011     | 0.000       | Transmitter    |
| Lack of Environmental Awareness                        | 1.50      | 0.00     | 0.011     | 0.000       | Transmitter    |
| Lack of Governmental Co-ordination                     | 1.95      | 0.00     | 0.011     | 0.000       | Transmitter    |
| Lack of Protection of Traditional Forest Communities   | 0.75      | 0.00     | 0.011     | 0.000       | Transmitter    |
| Lack of Public Policy                                  | 0.90      | 0.75     | 0.017     | 0.003       | Ordinary       |
| Lack of Sustainable Development Models                 | 1.50      | 0.25     | 0.016     | 0.004       | Ordinary       |
| Lack of Technical Training and Assistance              | 0.75      | 0.75     | 0.014     | 0.005       | Ordinary       |
| Loss of Biodiversity                                   | 0.00      | 2.00     | 0.083     | 0.000       | Receiver       |
| Loss of Environmental Services                         | 0.00      | 2.25     | 0.140     | 0.000       | Receiver       |
| Opportunities to Sell Environmental Services           | 0.50      | 0.00     | 0.011     | 0.000       | Transmitter    |
| Population Purchasing Power                            | 0.50      | 3.00     | 0.041     | 0.013       | Ordinary       |
| Pressure from External Actors                          | 0.90      | 0.25     | 0.013     | 0.004       | Ordinary       |
| Social Organisation and Social Political Participation | 1.50      | 0.25     | 0.014     | 0.002       | Ordinary       |
| Technical and Productive Capacity                      | 0.50      | 0.75     | 0.013     | 0.002       | Ordinary       |
| Technology Supplied For Sustainable Land Use           | 0.38      | 0.00     | 0.011     | 0.000       | Transmitter    |
| Use of agrochemicals                                   | 0.75      | 0.75     | 0.023     | 0.006       | Ordinary       |

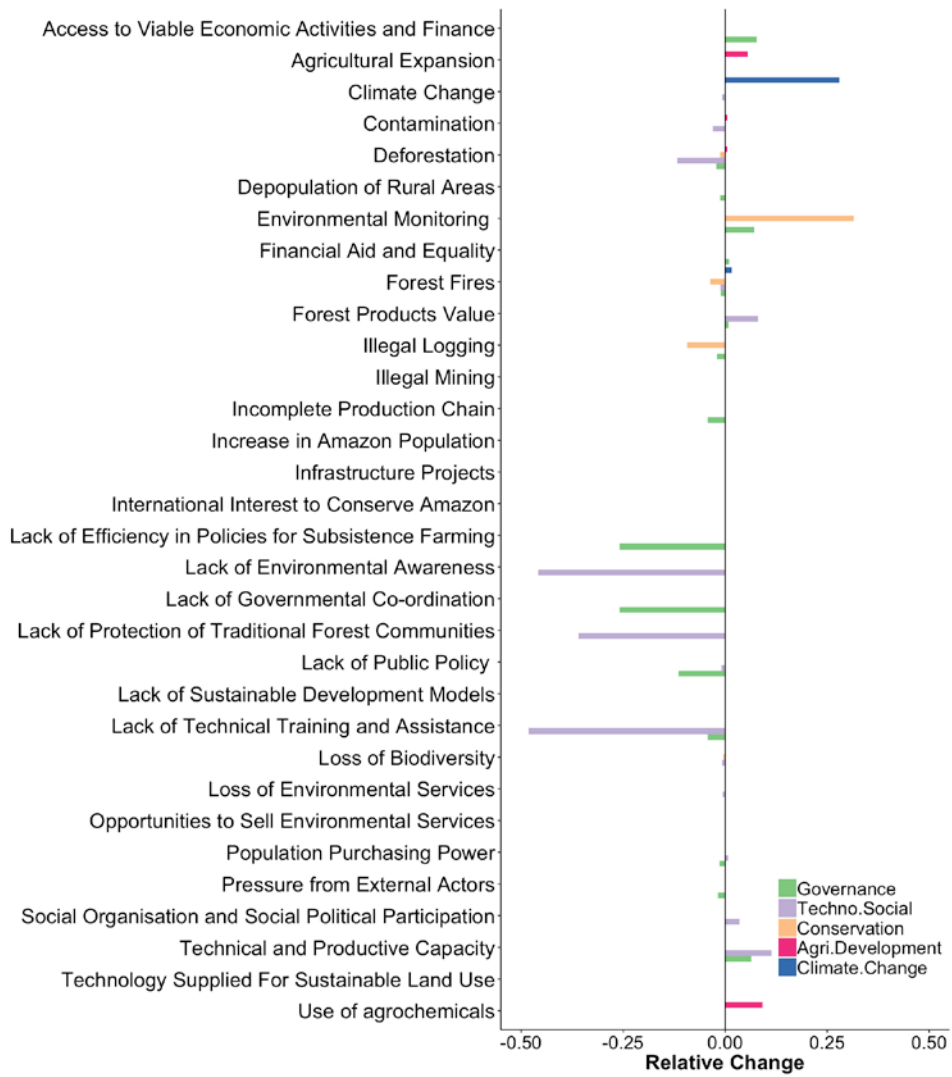

**Figure S1.** Relative change of individual component values in Guarayos under the conditions of the five scenarios compared with baseline.

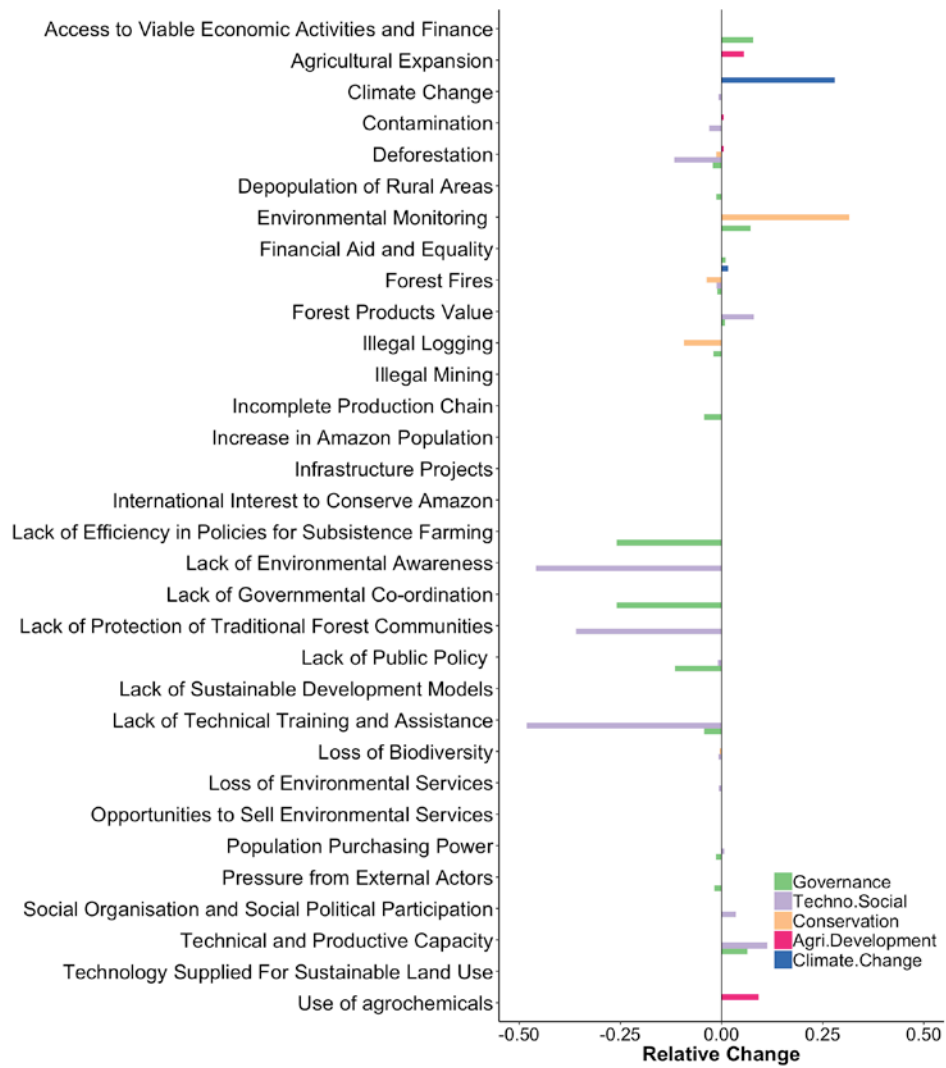

**Figure S2.** Relative change of individual component values in Tapajós under the conditions of the five scenarios compared with baseline.
